# Supplementary material
Source: publisher site journal article supplement (https://www.dovepress.com/article/234565)
Supplement: Supplementary file 1 [file get_supplementary_file.php]

# Supplementary document

Sensitivity analysis for accuracy of binary logistic models

LiSat-life, LiSat-somhealth or LiSat-psychhealth were treated as continuous variables and group membership predicted by logistic models as state variable (satisfied=1 and dissatisfied =0). The area under the receiver operating characteristic (ROC) curve (AUC) was used to quantify the binary outcomes.

LiSat-life model, AUC = 0.73 (95% CI: 0.71-0.75)

LiSat-somhealth model, AUC = 0.77 (95% CI: 0.75-0.80)

LiSat-psychhealth model, AUC = 0.79 (95% CI: 0.77-0.82)

An AUC level under 0.5–0.7 is of rather low accuracy, between 0.7–0.9 is considered good accuracy and over 0.9 is considered high accuracy. 1

1. Swets JA. Measuring the accuracy of diagnostic systems. *Science.* 1988;240(4857):1285-1293.
